# Supplementary material for: Microalgae oil fromSchizochytriumsp. alleviates obesity and modulates gut microbiota in high-fat diet-fed mice
Source: Royal Society of Chemistry journal article supplement (doi:10.1039/d2fo01772e), 2022-01-01
Supplement: d2fo01772e2.pdf [file d2fo01772e2.pdf]

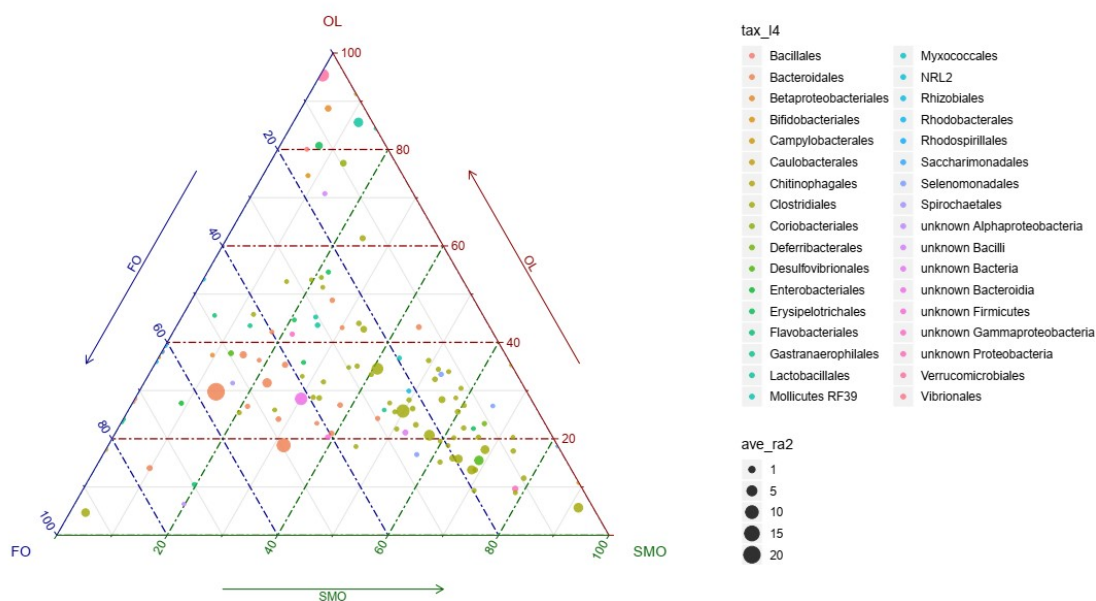

**Fig. S2** Ternary plot illustrating the differently distributed bacterial species among the SMO, FO, and OL groups. The size of the circle represents the relative abundance of each species, and the color represents species affiliated with different major orders.
