# Supplementary material for: Microalgae oil fromSchizochytriumsp. alleviates obesity and modulates gut microbiota in high-fat diet-fed mice
Source: Royal Society of Chemistry journal article supplement (doi:10.1039/d2fo01772e), 2022-01-01
Supplement: d2fo01772e3.pdf [file d2fo01772e3.pdf]

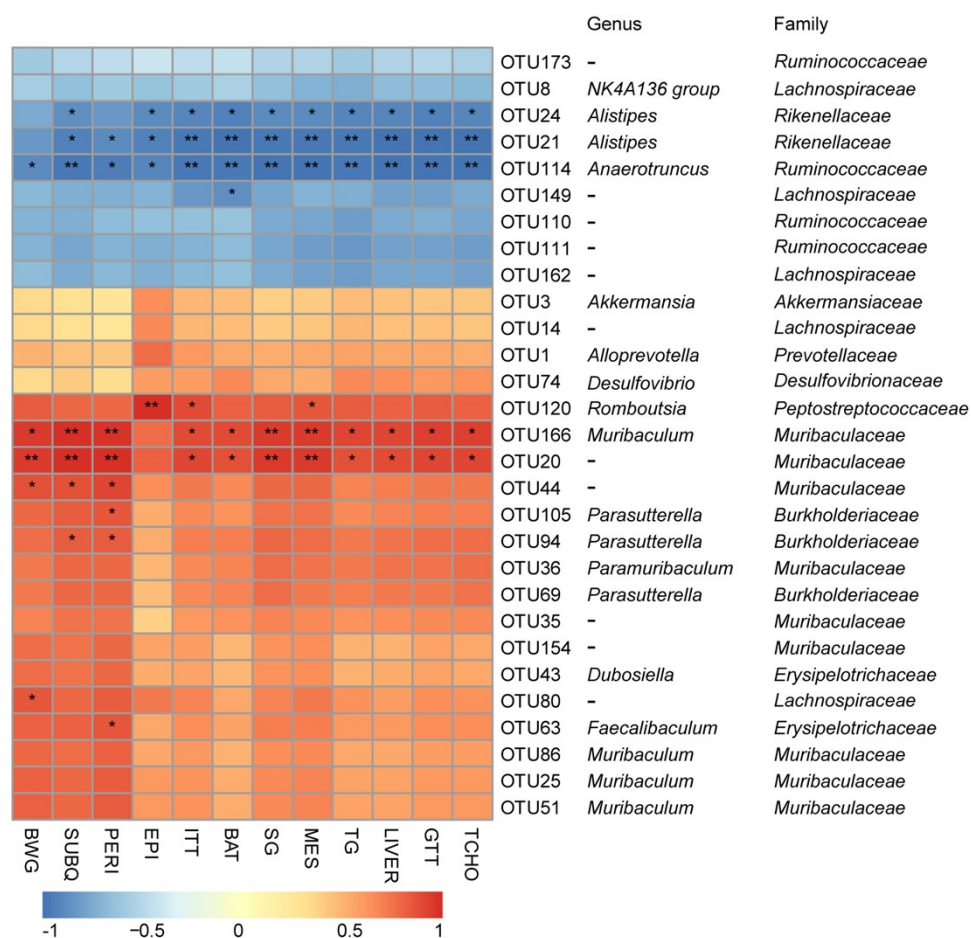

**Fig. S3** Heatmap of Pearson's correlation between the differently prevalent OTUs and obesity related indices in the HF and SMO group. BAT, brown adipose tissue; SUBQ, subcutaneous white adipose tissue; EPI, epididymal white adipose tissue; PERI, perinephric white adipose tissue; MES, mesenteric white adipose tissue; BWG, body weight gain; ITT, AUC of ITT; GTT, AUC of GTT; SG, serum glucose; LIVER, weight of liver; TG, serum TG; TCHO, serum TCHO. Significant correlations are noted by \* ( $P \leq 0.05$ ) and \*\* ( $P \leq 0.01$ ).
