# Supplementary material for: Microalgae oil fromSchizochytriumsp. alleviates obesity and modulates gut microbiota in high-fat diet-fed mice
Source: Royal Society of Chemistry journal article supplement (doi:10.1039/d2fo01772e), 2022-01-01
Supplement: d2fo01772e4.pdf [file d2fo01772e4.pdf]

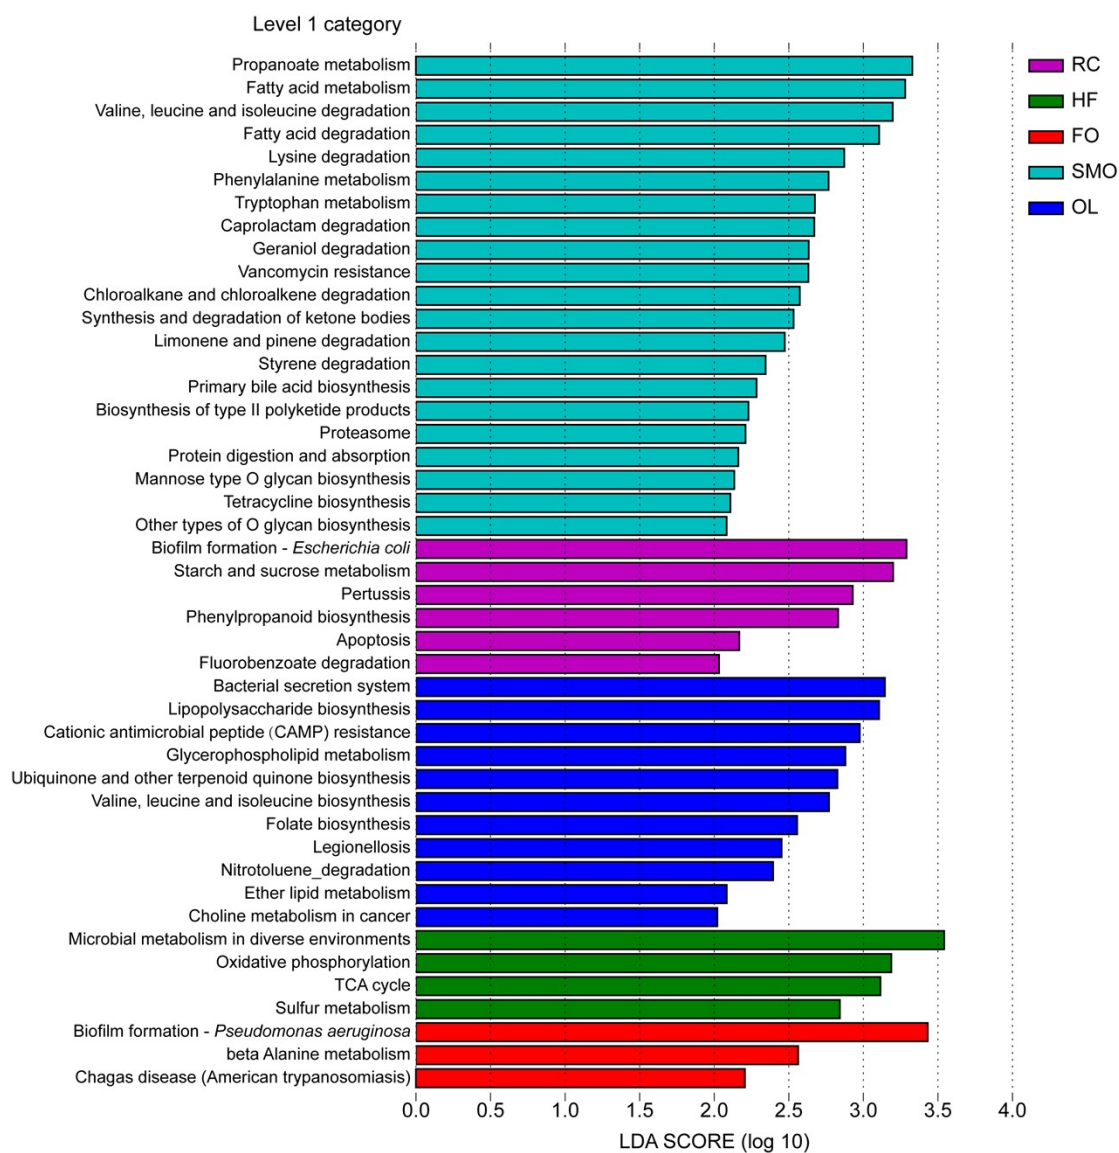

**Fig. S4** LDA analysis revealing the differentially enriched bacterial community functional pathways predicted by Tax4Fun2 among the five groups.
