# Supplementary material for: Microalgae oil fromSchizochytriumsp. alleviates obesity and modulates gut microbiota in high-fat diet-fed mice
Source: Royal Society of Chemistry journal article supplement (doi:10.1039/d2fo01772e), 2022-01-01
Supplement: d2fo01772e5.pdf [file d2fo01772e5.pdf]

**Table S1** Composition of the fatty acids in FO and SMO

| Fatty acids    | Content of the Fatty acids (mg/g total fatty acids) |       |
|----------------|-----------------------------------------------------|-------|
|                | SMO                                                 | FO    |
| C8:0           | 0                                                   | 0.1   |
| C10:0          | 0                                                   | 0.2   |
| C12:0          | 0                                                   | 1.2   |
| C13:0          | 0                                                   | 0.5   |
| C14:0          | 0                                                   | 89.7  |
| C14:1          | 0                                                   | 0.5   |
| C15:0          | 0                                                   | 6.5   |
| C16:0          | 0.5                                                 | 196.8 |
| C16:1          | 0                                                   | 101.7 |
| C17:0          | 0                                                   | 7.6   |
| C18:0          | 0.2                                                 | 39.7  |
| C18:1n9c       | 0.2                                                 | 94.1  |
| C18:2n6c       | 0.3                                                 | 14.7  |
| C18:3n6        | 1.5                                                 | 0     |
| C18:3n3        | 0                                                   | 10.5  |
| C20:0          | 0                                                   | 3.5   |
| C20:1          | 0                                                   | 13.1  |
| C21:0          | 0                                                   | 2.7   |
| C20:2          | 0                                                   | 0.5   |
| C20:3n6        | 0                                                   | 1.9   |
| C20:4n6        | 0.6                                                 | 10.8  |
| C20:3n3        | 0                                                   | 1     |
| C20:5n3 (EPA)  | 10.7                                                | 193   |
| C22:0          | 0                                                   | 2.6   |
| C22:1n9        | 0                                                   | 2.2   |
| C22:2          | 0                                                   | 0.2   |
| C23:0          | 8.4                                                 | 9.2   |
| C24:0          | 0                                                   | 22.8  |
| C22:6n3 (DHA)  | 977.6                                               | 167.2 |
| C24:1          | 0                                                   | 5.6   |
| $\Sigma$ SFAs  | 9.1                                                 | 383.1 |
| $\Sigma$ MUFAs | 0.2                                                 | 217.2 |
